# Supplementary material for: Uniaxial tension-induced fracture in gold nanowires with the dependence on size and atomic vacancies
Source: Royal Society of Chemistry journal article supplement (doi:10.1039/c4cp03556a), 2014-01-01
Supplement: c4cp03556a1.pdf [file c4cp03556a1.pdf]

## Supporting information

### **Uniaxial tension-induced fracture in gold nanowires with the dependence of sizes and atomic vacancies**

Fenyng Wang,<sup>1,\*</sup> Yanfeng Dai,<sup>1</sup> Jianwei Zhao,<sup>2</sup> Qianjin Li<sup>2</sup>

<sup>1</sup> *School of Chemistry, Material Science and Engineering, Nanchang University, Nanchang  
330031, P. R. China*

<sup>2</sup> *State Key Laboratory of Analytical Chemistry for Life Science, School of Chemistry and  
Chemical Engineering, Nanjing University, Nanjing 210008, P. R. China*

## Supplementary Multimedia Captions

**Video S1** A movie of deformation behavior of the [100] single-crystal gold nanowire at the size I of  $(3a \times 3a \times 9a)$ , (Video S1.avi).

**Video S2** A movie of deformation behavior of the [100] single-crystal gold nanowire at the size II of  $(9a \times 9a \times 27a)$ , (Video S2.avi)

**Video S3** A movie of deformation behavior of the [100] single-crystal gold nanowire with the vacancy ratio of 4% at the size I of  $(3a \times 3a \times 9a)$ , (Video S3.avi)

**Video S4** A movie of deformation behavior of the [100] single-crystal gold nanowire with the vacancy ratio of 35% at the size I of  $(3a \times 3a \times 9a)$ , (Video S4.avi)

**Video S5** A movie of deformation behavior of the [100] single-crystal gold nanowire with the vacancy ratio of 0.6% at the size II of  $(9a \times 9a \times 27a)$ , (Video S5.avi)

**Video S6** A movie of deformation behavior of the [100] single-crystal gold nanowire with the vacancy ratio of 30% at the size II of  $(9a \times 9a \times 27a)$ , (Video S6.avi)
